# Supplementary material for: Polyamidoamine Nanoparticles for the Oral Administration of Antimalarial Drugs
Source: PubMed Central journal article supplement (PMC6321545; doi:10.3390/pharmaceutics10040225), 2018-11-10
Supplement: pharmaceutics-10-00225-s001.pdf [file pharmaceutics-10-00225-s001.pdf]

# Supplementary Materials: Polyamidoamine Nanoparticles for the Oral Administration of Antimalarial Drugs

Elisabet Martí Coma-Cros, Arnau Biosca, Joana Marques, Laura Carol, Patricia Urbán, Diana Berenguer, Maria Cristina Riera, Michael Delves, Robert E. Sinden, Juan José Valle-Delgado, Lefteris Spanos, Inga Siden-Kiamos, Paula Pérez, Krijn Paaijmans, Matthias Rottmann, Amedea Manfredi, Paolo Ferruti, Elisabetta Ranucci and Xavier Fernández-Busquets

## Supplementary Methods

### 1. Reagents

4-Aminobutylguanidine sulfate (97%), lithium hydroxide monohydrate (99%), 2-methylpiperazine (98%), *N,N'*-methylenebisacrylamide (96%), cystamine hydrochloride (96%), 2-mercaptoethanol (99%) and calcium chloride (97%) were purchased from Sigma-Aldrich and used as received. 2,2-bis(acrylamido)acetic acid (94%) was synthesized as previously described [1].

### 2. Instruments

<sup>1</sup>H and <sup>13</sup>C NMR spectra were run on a Bruker Advance 400 spectrometer operating at 400.132 (<sup>1</sup>H) and 100.623 (<sup>13</sup>C) MHz. Size exclusion chromatography traces were obtained with a Knauer Pump 1000 equipped with a Knauer Autosampler 3800, TSKgel G4000 PW and G3000 PW Tosohaas columns connected in series, Light Scattering Viscotek 270 Dual Detector, UV detector Waters model 486, operating at 230 nm, and a refractive index detector Waters model 2410. The mobile phase was Tris-HCl buffer, pH 8.0 (0.05 M with 0.2 M sodium chloride). The flow rate was 1 mL/min and sample concentration 1% *w/v*.

### 3. Synthesis of PAAs

#### 3.1. ISA1

Bis(acryloyl)piperazine (1.00 g, 5.15 mmol), *N,N'*-bis(hydroxyethyl)ethylenediamine (0.27 g, 2.575 mmol) and 2-methylpiperazine (0.395 g, 2.575 mmol) were dissolved in distilled water (2.0 mL) under nitrogen atmosphere and the reaction mixture was maintained at room temperature for 80 h. After this time, the product was isolated by diluting with water (3 mL), acidifying with a few drops of 12 M hydrochloric acid down to pH 4 and finally ultrafiltering through a membrane with a nominal molecular weight cutoff of 5000 Da. The retained portion was recovered by freeze-drying. Yield: 0.95 g.

<sup>1</sup>H NMR (D<sub>2</sub>O): δ = 1.08 (d, CH<sub>3</sub>-CH); 2.46 (m, CH); 2.53 (m, CH<sub>2</sub>-CON); 2.7 (m, CH<sub>2</sub>-CH<sub>2</sub>-CON); 3.50-3.55 (CH<sub>2</sub>-NCO); 3.61 (CH<sub>2</sub>-O); 3.63-3.65 (*t*-amine CH<sub>2</sub>-N).

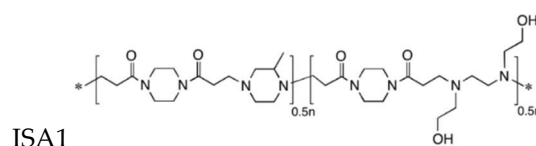

#### 3.2. ISA23

2,2-bis(acrylamido acetic) acid (1.00 g, 5.03 mmol) and lithium hydroxide monohydrate (0.21 g, 5.03 mmol) were dissolved in distilled water (2.0 mL) under nitrogen atmosphere, and piperazine

(0.433 g, 5.03 mmol) was then added to the obtained solution. The reaction mixture was maintained under nitrogen atmosphere at room temperature, and occasionally stirred, for 72 h. After this time, the product was isolated as described for ISA1. Yield: 1.01 g.

NMR spectral data as in [2].

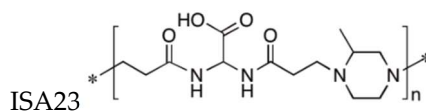

### 3.3. AGMA1

2,2-bis(acrylamido acetic) acid (1.00 g, 5.03 mmol) and lithium hydroxide monohydrate (0.21 g, 5.03 mmol) were dissolved in distilled water (2.5 mL) under nitrogen atmosphere. Agmatine sulfate (1.18 g, 5.03 mmol) and lithium hydroxide monohydrate (0.21 g, 5.03 mmol) were then added to this solution. The reaction mixture was maintained under nitrogen atmosphere at room temperature, and occasionally stirred, for 72 h. After this time, the product was isolated as described for ISA1. Yield: 1.5 g.

NMR spectral data as in [3].

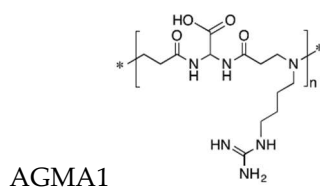

### 3.4. ARG07

*N,N'*-methylenebisacrylamide (1.00 g, 6.22 mmol) was dispersed in water (4 mL), and L-arginine (1.095 g, 6.225 mmol) and calcium chloride were added under vigorous stirring under nitrogen atmosphere. The reaction mixture was then heated to 50 °C under stirring for 2 days. It gradually became homogeneous and was kept under nitrogen atmosphere for a further 3 weeks. The terminal double bonds in the resultant product, if any, were saturated by adding morpholine (54.48 mg, 0.622 mmol) and incubating at room temperature for a further 2 h. After this time, the product was isolated as described for ISA1. Yield: 1.00 g.

NMR spectral data as in [4].

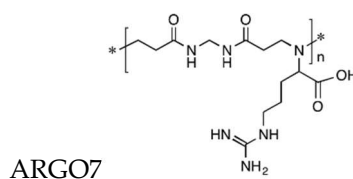

## 4. Incorporation of thiol units into PAAs

### 4.1. ARG07-SH

L-Arginine (6.190 g, 35 mmol) and calcium chloride (0.401 g, 3.5 mmol) were added to a suspension of *N,N'*-methylenebisacrylamide (8.030 g, 50 mmol) in water (18 mL) under vigorous stirring. The reaction mixture was then heated to 50 °C until dissolution and kept under nitrogen atmosphere with gentle stirring for 1 day. After this time, the reaction mixture was cooled down to room temperature and cystamine dihydrochloride (1.759 g, 7.5 mmol) and lithium hydroxide monohydrate (0.636 g, 15 mmol) were added. The reaction mixture was kept at room temperature for 3 months and then water (40 mL) and excess mercaptoethanol (8.0 mL) were added to the hydrogel formed. Dissolution occurred after 6 days, when the solution obtained was diluted with water (100 mL), acidified to pH 4.5 with 37% hydrochloric acid and finally ultrafiltered through a membrane

with nominal molecular weight cutoff of 3000 Da. The product was recovered in 55% yield by freeze-drying the retained fraction.  $\bar{M}_n = 6700$ , PDI = 1.48.

$^1\text{H}$  NMR ( $\text{D}_2\text{O}$ ):  $\delta$  (ppm) = 1.58–1.95 (br,  $\text{CHCH}_2\text{CH}_2$ ); 2.65–2.80 (m,  $\text{NHCOCH}_2$ ); 2.90–2.92 (m,  $\text{CH}_2\text{S}$ ); 3.17–3.30 (m,  $\text{CH}_2\text{CH}_2\text{NH}$ ); 3.35–3.53 (m,  $\text{NCOCH}_2\text{CH}_2\text{N}$  and  $\text{NCH}_2\text{CH}_2\text{S}$ ); 3.70–3.76 (m,  $\text{NCHCOOH}$ ); 4.54–4.56 (br s,  $\text{NHCH}_2\text{NH}$ ).

$^{13}\text{C}$  NMR ( $\text{D}_2\text{O}$ ):  $\delta$  (ppm) = 19.1 ( $\text{CH}_2\text{S}$ ); 24.4 ( $\text{CHCH}_2\text{CH}_2$ ); 25.5 ( $\text{CHCH}_2\text{CH}_2$ ); 30.5 ( $\text{NHCOCH}_2$ ); 40.8 ( $\text{CH}_2\text{CH}_2\text{NH}$ ); 44.3 ( $\text{NHCH}_2\text{NH}$ ); 44.7 ( $\text{NCH}_2\text{CH}_2$ ); 55.2 ( $\text{NCH}_2\text{CH}_2\text{S}$ ); 66.6 ( $\text{CHCOOH}$ ); 156.8 ( $\text{H}_2\text{NC}=\text{NH}$ ); 172.8 ( $\text{NHCO}$ ); 174.1 ( $\text{COOH}$ ).

AGMA1-SH and ISA23-SH were prepared as reported for ARGO7-SH, by performing the reactions at room temperature for 14 days and using the reagent amounts indicated below.

#### 4.2. AGMA1-SH

4-aminobutylguanidine (agmatine) sulfate (3.244 g, 14.0 mmol); 2,2-bis(acrylamido)acetic acid (4.210 g, 20.0 mmol); lithium hydroxide monohydrate (1.695 g, 40.0 mmol); cystamine dihydrochloride (0.704 g, 3.0 mmol); water (18 mL). Yield 68%,  $\bar{M}_n = 8400$ , PDI = 1.25.

$^1\text{H}$  NMR ( $\text{D}_2\text{O}$ ):  $\delta$  (ppm) = 1.52–1.60 (br,  $\text{NCH}_2\text{CH}_2\text{CH}_2$ ); 1.71–1.77 (br,  $\text{NCH}_2\text{CH}_2$ ); 2.64–2.76 (br,  $\text{NHCOCH}_2$ ); 2.92–2.94 (m,  $\text{CH}_2\text{S}$ ); 3.08–3.20 (m,  $\text{NCOCH}_2\text{CH}_2\text{N}$ ); 3.34–3.47 (br,  $\text{NCH}_2\text{CH}_2\text{CH}_2$  and  $\text{NCH}_2\text{CH}_2\text{S}$ ); 5.51–5.56 (s,  $\text{CHCOOH}$ ).

$^{13}\text{C}$  NMR ( $\text{D}_2\text{O}$ ):  $\delta$  (ppm) = 18.5 ( $\text{CH}_2\text{S}$ ); 22.3 ( $\text{NCH}_2\text{CH}_2\text{CH}_2$ ); 25.0 ( $\text{NCH}_2\text{CH}_2$ ); 29.0 ( $\text{NHCOCH}_2$ ); 40.4 ( $\text{CH}_2\text{CH}_2\text{NH}$ ); 49.1 ( $\text{NCH}_2\text{CH}_2\text{CONH}$ ); 52.5 ( $\text{NCH}_2\text{CH}_2\text{CH}_2\text{CH}_2\text{NH}$ ); 54.8 ( $\text{NCH}_2\text{CH}_2\text{S}$ ); 56.0 ( $\text{CHCOOH}$ ); 155.1 ( $\text{H}_2\text{NC}=\text{NH}$ ); 171.3 ( $\text{NHCO}$ ); 173.5 ( $\text{COOH}$ ).

#### 4.3. ISA23-SH

2-methylpiperazine (1.431 g, 14.0 mmol); 2,2-bis(acrylamido)acetic acid (4.210 g, 20.0 mmol), lithium hydroxide monohydrate (1.102 g, 26.0 mmol); cystamine dihydrochloride (0.704 g, 3.0 mmol); water (7.5 mL). Yield 66%,  $\bar{M}_n = 9200$ , PDI = 1.73.

$^1\text{H}$  NMR ( $\text{D}_2\text{O}$ ):  $\delta$  (ppm) = 1.28 (d,  $\text{CH}_3$ ); 2.55–2.65 (m,  $\text{NHCOCH}_2$ ); 2.80–2.90 (m,  $\text{CH}_2\text{S}$ ); 2.97–3.10 (m,  $\text{NCOCH}_2\text{CH}_2\text{N}$ ); 3.20–3.61 (br,  $\text{NCH}_2\text{CH}_2\text{N}$ ,  $\text{NCH}_2\text{CH}_2\text{N}$  and  $\text{NCH}_2\text{CH}_2\text{S}$ ); 5.48 (s,  $\text{CHCOOH}$ ).

$^{13}\text{C}$  NMR ( $\text{D}_2\text{O}$ ):  $\delta$  (ppm) = 14.0 ( $\text{CH}_3$ ); 20.0 ( $\text{CH}_2\text{SH}$ ); 30.6 ( $\text{COCH}_2\text{CH}_2\text{N}$ ); 48.8 ( $\text{NCH}_2\text{CH}_2\text{N}$ ); 49.6 ( $\text{NCH}_2\text{CH}_2\text{N}$ ); 52.4 ( $\text{NCOCH}_2\text{CH}_2\text{N}$ ); 55.4 ( $\text{NCH}_2\text{CH}_2\text{N}$ ); 56.1 ( $\text{NCH}_2\text{CH}_2\text{S}$ ); 56.2 ( $\text{NCH}_2\text{CH}_2\text{N}$ ); 58.3 ( $\text{CHCOOH}$ ); 171.9 ( $\text{NHC}=\text{O}$ ); 173.1 ( $\text{COOH}$ ).

### 5. In vitro analysis of PAA targeting to mosquito stages of Plasmodium

#### 5.1. Plasmodium falciparum gametocyte culture and targeting assay

Gametocytes of the *P. falciparum* NF54 strain were obtained from continuously maintained cultures of asexual blood stage parasites, setting up flasks at 1% parasitaemia and 3% hematocrit. Gametocytes began to form in significant numbers in blood culture following daily medium change. All operations were performed on a warming plate set to 37/38 °C in order to minimize heat loss to cultures during the time they were out of the incubator. Smears and an exflagellation test were performed on culture days 4, 7, 10, and 14. For the exflagellation test, a few  $\mu\text{L}$  of the culture were spun down and, after discarding the supernatant, the pellet was taken up in 5  $\mu\text{L}$  of ookinete medium and added to a disposable counting slide; after 20 min incubation at room temperature the slide was observed under the microscope with the 40 $\times$  objective. For targeting assays, 10 mL of a *P. falciparum* stage V gametocyte culture was centrifuged (37 °C, 5 min, 500 g), and the culture pellet was taken up in 3 mL of incomplete RPMI medium and added (1:1 *v/v*) to a heparin solution in the same buffer. Samples were incubated in the presence of 0.25 mg/mL PAA-FITC for 90 min at 37 °C, and the cultures were subsequently spun down and washed 3 times with incomplete RPMI medium. Smears were fixed with 4% paraformaldehyde, stained with DAPI, and examined by fluorescence confocal microscopy.

### 5.2. *Plasmodium berghei* ookinete culture and targeting assay

Ookinete culture medium consisted of 16.4 g/L RPMI supplemented with 2% *w/v* NaHCO<sub>3</sub>, 0.05% *w/v* hypoxanthine, 100 µM xanthurenic acid, 50 U/mL penicillin, 50 µg/mL streptomycin (Invitrogen), 25 mM HEPES, pH 7.4. Complete medium was prepared just before use by supplementing with heat-inactivated fetal bovine serum (FBS, Invitrogen) to a final concentration of 20%. Six days prior to performing the targeting assay, a mouse was treated intraperitoneally with 10 µg/mL phenylhydrazine (PHZ) to induce reticulocytosis. Three days after PHZ treatment the mouse was inoculated by intraperitoneal injection of 200 µL of blood containing ca.  $5 \times 10^7$  *P. berghei* mCherry (a kind gift from Dr. D. Vlachou) pBRCs extracted by cardiac puncture from a donor mouse that had been infected intraperitoneally 3 days before with 200 µL of a cryopreserved *P. berghei* suspension just thawed. Three days later, 1 mL of infected blood was collected by cardiac puncture onto 30 mL ookinete medium, and incubated for 24 h at 19-21 °C with 70-80% relative humidity. For ookinete targeting assays, 100 µL of 0.25 mg/mL PAA-FITC were added to 100 µL of culture and incubated in the dark for 90 min under orbital stirring (300 rpm). The samples were centrifuged for 1.5 min at 800 g and washed 3× with PBS. Fixed cell slides were prepared by adding 0.5 µL FBS to 0.5 µL pellet and by fixing the smear with 4% paraformaldehyde for 15 min. After performing 3 washing steps with PBS, slides were mounted with Vectashield® DAPI-containing media (Vector Laboratories, UK). All work involving laboratory animals was performed in accordance with the EU regulations 'EU Directive 86/609/EEC' and within the regulations of the United Kingdom Animals (Scientific Procedures) Act 1986.

### 5.3. *P. berghei* oocyst culture and targeting assay

After performing direct *Anopheles stephensi* feeding on malaria-infected mice as described above, for oocyst targeting assay mosquitoes were dissected for midguts on day 10 post-feeding. After anesthetizing the mosquitoes with CO<sub>2</sub> and keeping them on ice, they were added to ~300 µL incomplete RPMI medium and the midguts were removed under a dissecting microscope and carefully collected onto a 24-well plate containing 500 µL incomplete RPMI medium (5 midguts/well). The guts were transferred to a well containing PAA-FITC dissolved in incomplete RPMI medium at 0.25 mg/mL, and incubated for 90 min at room temperature with gentle stirring. Samples were then washed 2 times with PBS, and fixed with 4% paraformaldehyde for 15 min. After fixation, 2 washing steps with PBS were performed, and the slides were finally prepared by transferring the midguts to a slide containing a few µL of Vectashield antifade mounting medium containing DAPI.

### 5.4. *P. berghei* sporozoite culture and targeting assay

Six days prior to feeding female *A. stephensi* mosquitoes, a mouse was treated intraperitoneally with PHZ as described above, and three days after treatment the mouse was infected by intraperitoneal injection with *P. berghei* mCherry pBRCs (a kind gift from Dr. D. Vlachou). The selected female mosquitoes were not fed with sugar in the 24 h preceding the blood feed but were kept hydrated with water. On the day of the feed, the parasitemia and gametocytemia of the mouse were recorded, and an exflagellation test was also performed. Subsequently the mouse was anesthetized and placed on the netting of the mosquito cage. The feed was maintained for 30 min at 19-21 °C in the dark. After feeding, as there was a pool of sticky blood on the bottom of the cage, the pot was laid on its side overnight at 19-21 °C with 70-80% humidity. On day 1 post-feeding, the mosquitoes were anesthetized with CO<sub>2</sub> and kept on ice while the unfed ones were removed. Mosquitoes were then fed with 5% glucose/0.05% 4-aminobenzoic acid every 2 days and maintained for 21 days at 19-21 °C and 70-80% humidity.

For sporozoite targeting assays, mosquitoes were dissected for salivary glands on day 21 post-feeding. Glands were sliced from the head and transferred to an eppendorf tube containing 50 µL of incomplete RPMI medium. After centrifugation for 10 min at 2350 g, the pellet was taken up in 100 µL of 0.2 mg PAA-FITC/mL incomplete RPMI and incubated for 90 min at 37 °C with gentle stirring. Samples were finally centrifuged for 5 min at 2350 g and washed 3 times with incomplete RPMI. When the last wash was completed, the pellet was taken up in Hoechst 33342 solution (0.05 µg/mL)

and a 5-min centrifugation step at 2350 g was performed. The pellet was finally taken up in incomplete RPMI and the slides containing live cells were prepared for confocal microscopy analyses.

### Supplementary Figures

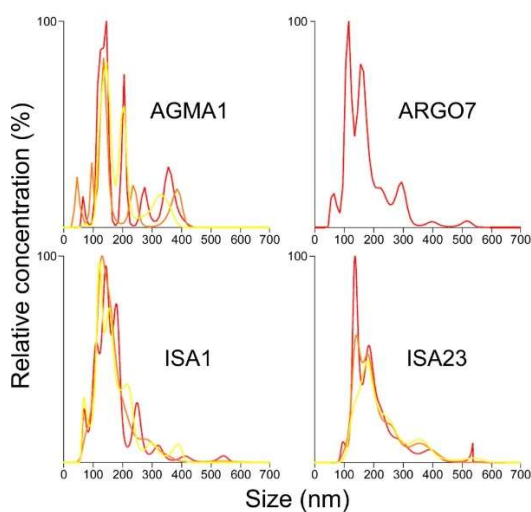

**Figure S1.** Nanoparticle tracking analysis of PAAs.

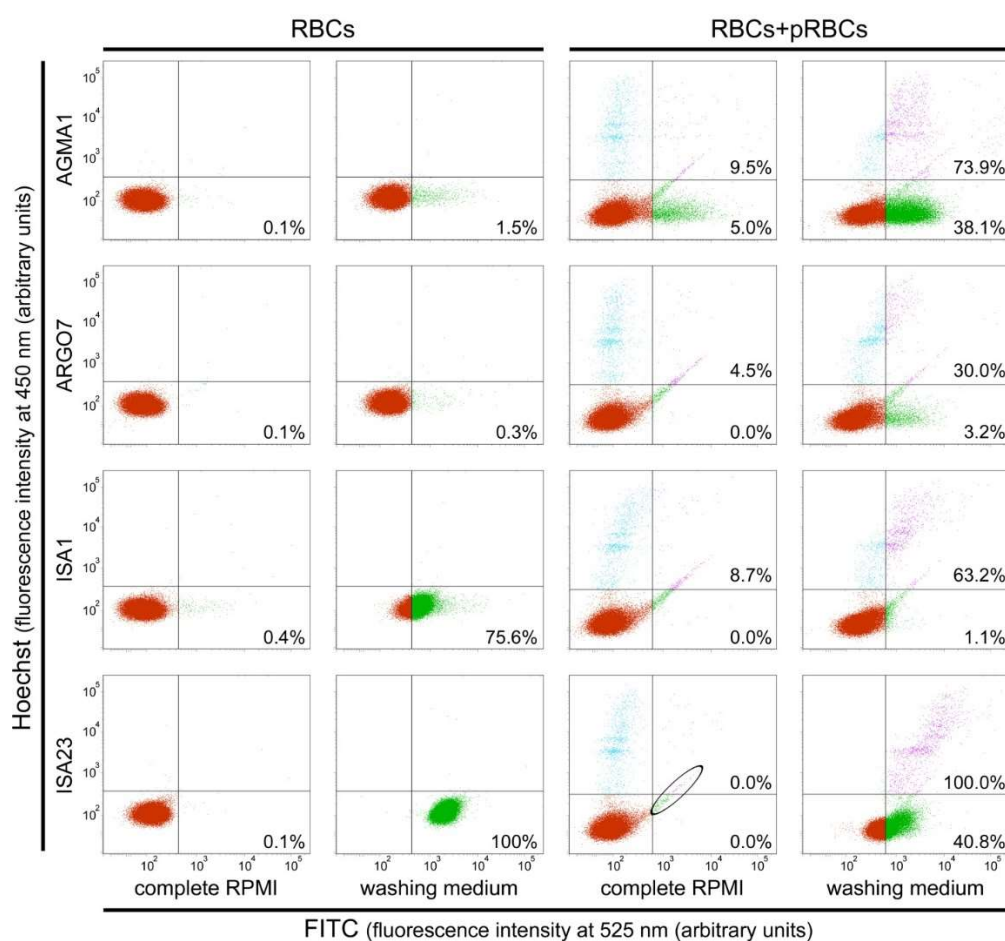

**Figure S2.** Flow cytometry analysis of the interaction of PAAs-FITC with RBCs and pRBCs in complete and incomplete RPMI (washing medium). The upper areas correspond to pRBCs (Hoechst fluorescence) and the right-hand areas correspond to PAA-bound cells (FITC fluorescence). Percentage values indicate the fraction of PAA-bound pRBCs (upper right areas) and RBCs (lower right areas). Unspecific fluorescence events (encircled for information only in the ISA23/RBCs+pRBCs/complete RPMI sample) were removed from the counting.

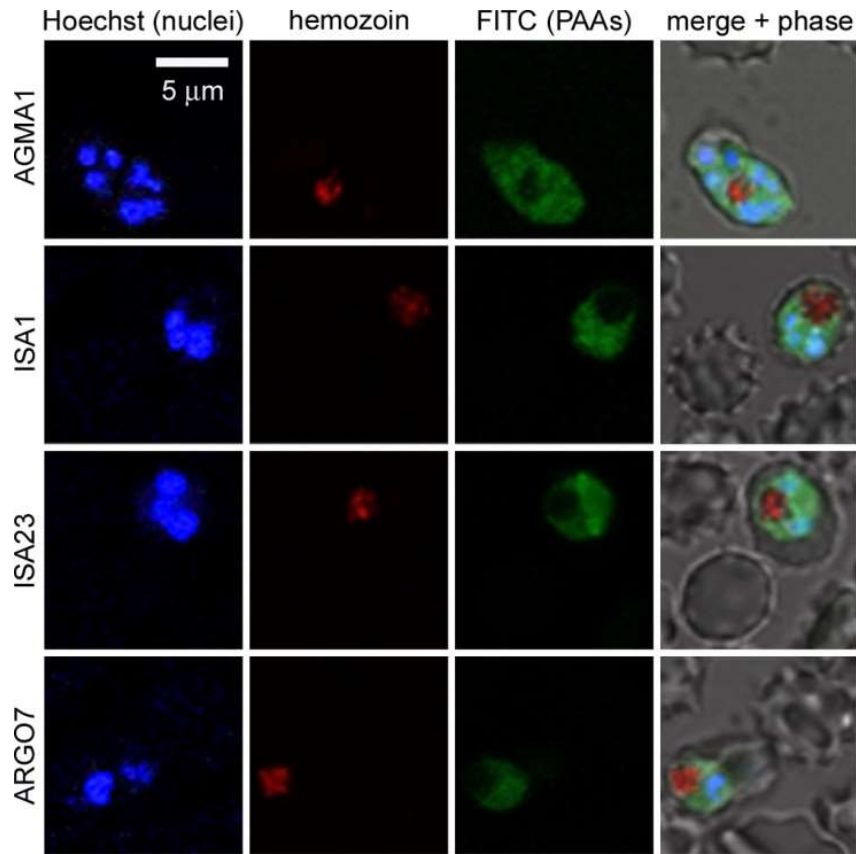

**Figure S3.** Confocal fluorescence microscopy targeting study of PAAs to *P. falciparum*-containing pRBCs. FITC-labeled polymers were added to living *P. falciparum* cultures of the 3D7 strain in incomplete RPMI and after 90 min of incubation the samples were processed for confocal fluorescence microscopy detection of fluorescein (PAAs), Hoechst (pRBCs), and the reflection of hemozoin crystals in pRBCs.

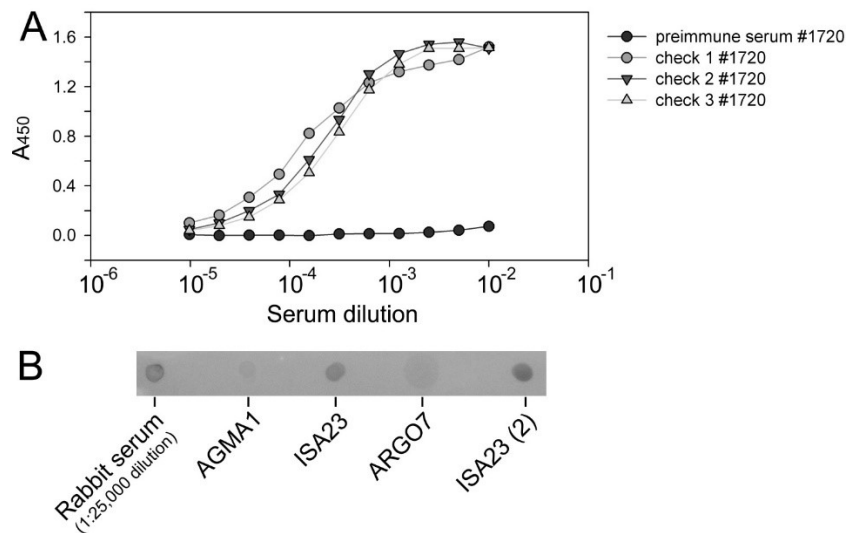

**Figure S4.** Generation of rabbit polyclonal antibodies against ISA23. (A) Titer determination at days 52, 73, and 93 after the initial immunization (check 1, 2 and 3, respectively). (B) Dot-blot assay to test the specificity of ISA23 antiserum. ISA23 and ISA23 (2) correspond to two different batches synthesized separately.

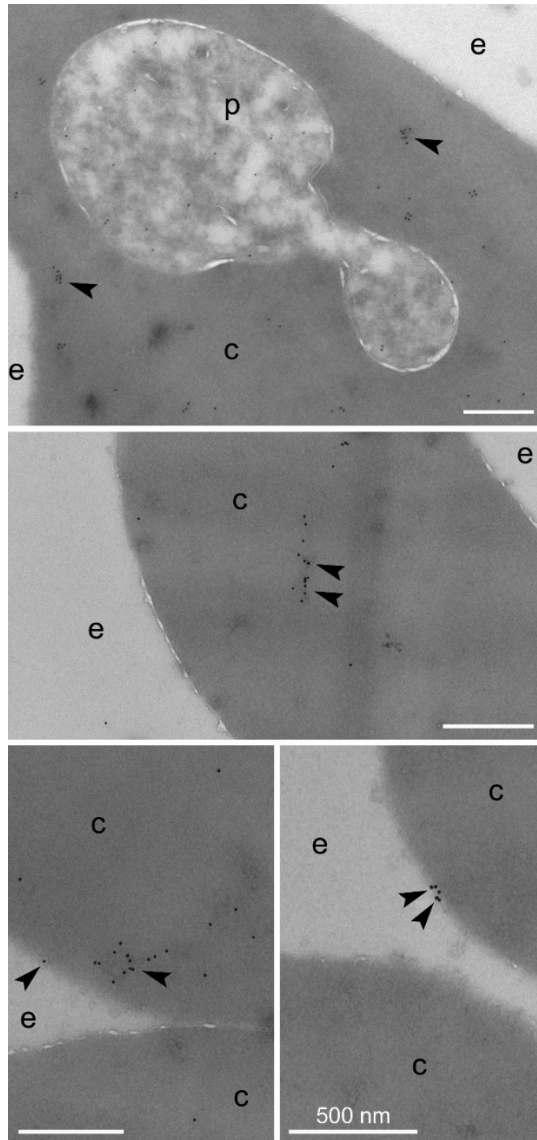

**Figure S5.** ImmunotEM analysis of the subcellular localization of ISA23 in *P. falciparum* ring stages. Living pRBCs were treated overnight with ISA23, washed, and processed for immunotEM. e, extracellular area; c, pRBC cytosol; p, *Plasmodium*. Size bars represent 500 nm.

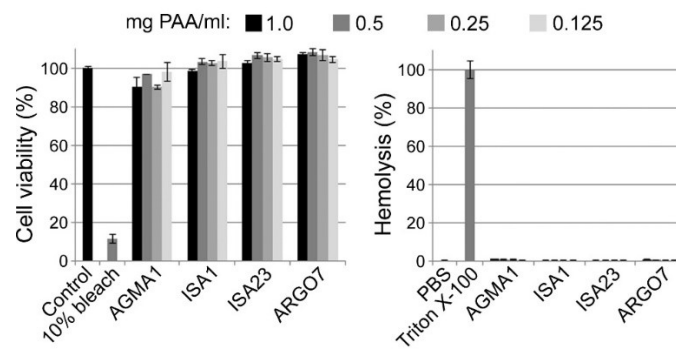

**Figure S6.** PAA cytotoxicity and hemolysis assays.

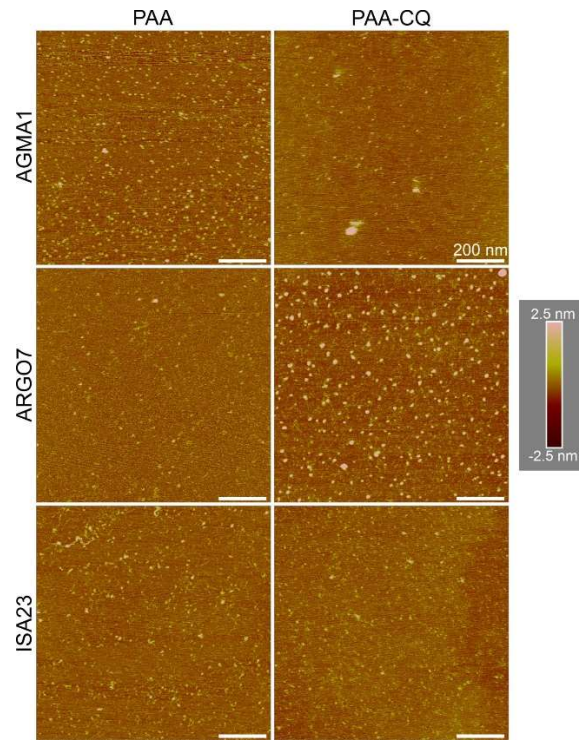

Figure S7. AFM images on mica of PAAs and of PAA-CQ complexes.

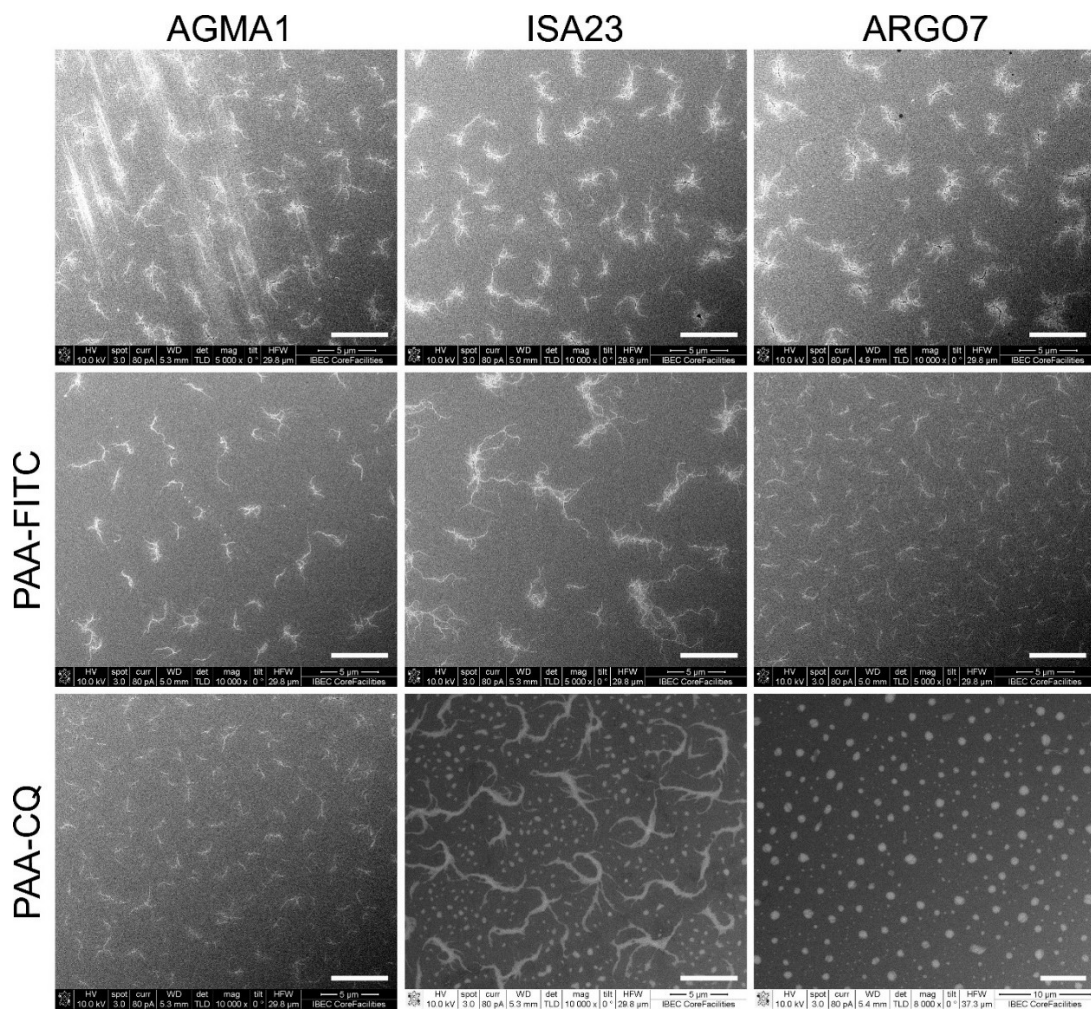

Figure S8. SEM analysis of PAAs, before (upper panels) and after the introduction of FITC groups (PAA-FITC) and the incorporation of CQ (PAA-CQ). The scale bar corresponds to 5  $\mu\text{m}$ .



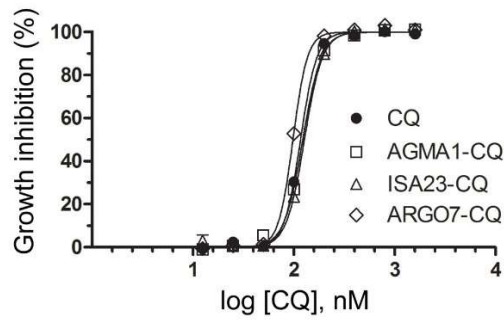

**Figure S9.** Growth inhibition assay of the effect on *in vitro* *P. falciparum* cultures of PAA-encapsulated CQ.

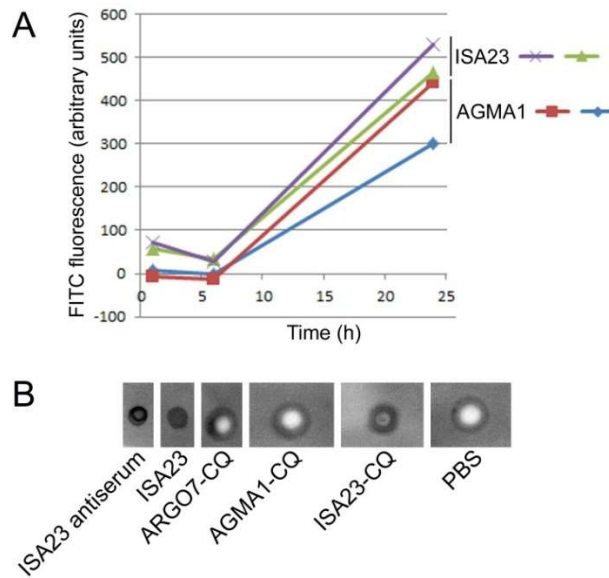

**Figure S10.** Detection in blood of orally administered PAAs. (A) Detection of FITC fluorescence in the plasma of mice orally-fed PAA-FITC. (B) Dot-blot assay of plasma samples obtained from mice orally-fed PAAs; for detection was used ISA23 antiserum, 3  $\mu$ L of which directly spotted at a 1:25,000 dilution is shown as a control. ISA23 (3  $\mu$ L of a 3 mg/mL solution) and PBS are also included as positive and negative controls, respectively.

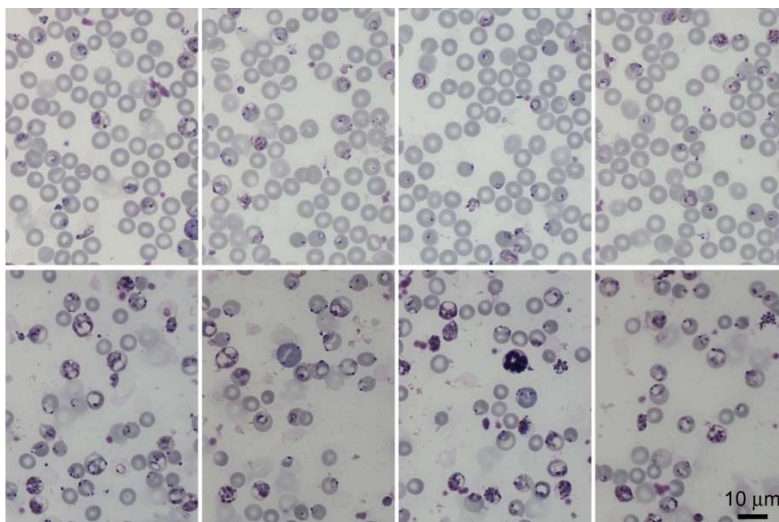

**Figure S11.** Microscopic images of blood smears prepared on days 3 and 5 post-infection (upper and lower row, respectively) from control *P. yoelii*-infected naïve mice left untreated.

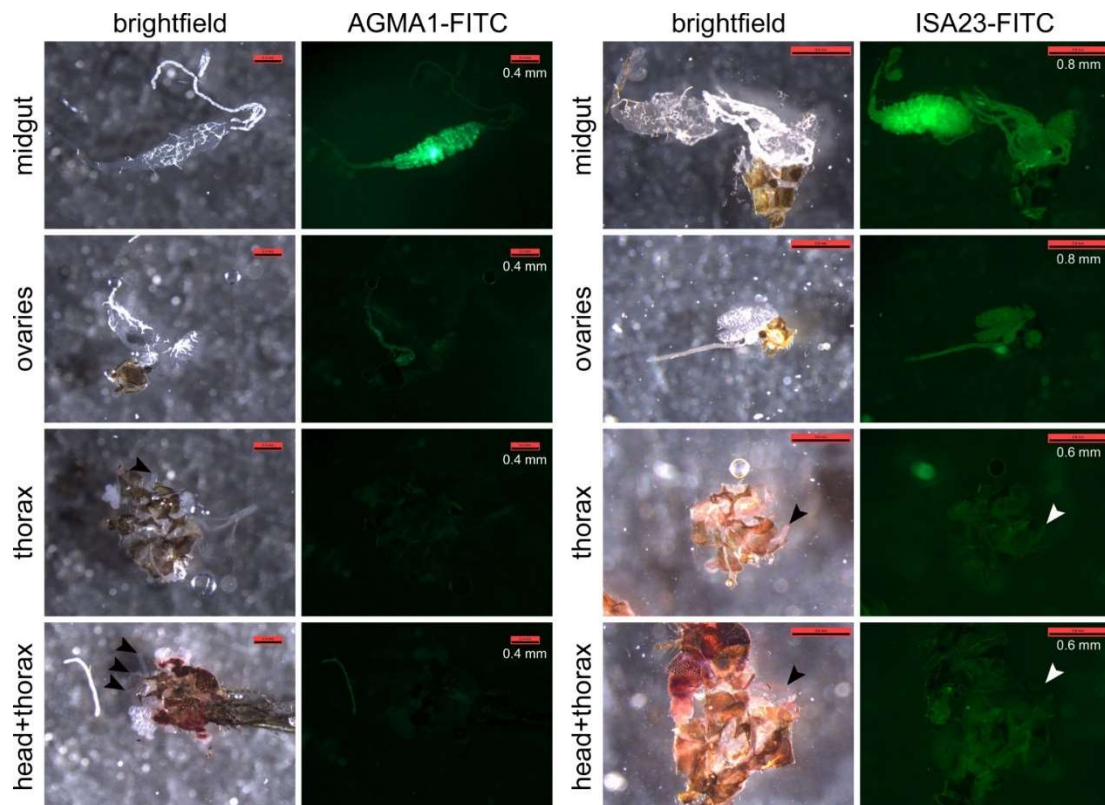

**Figure S12.** Direct delivery of PAAs to *Anopheles gambiae*. Fluorescein-labeled AGMA1 or ISA23 were diluted in the sugar meal provided to the mosquitoes during three or five days before proceeding to dissection and observation by fluorescence microscopy. The arrowheads indicate salivary glands.

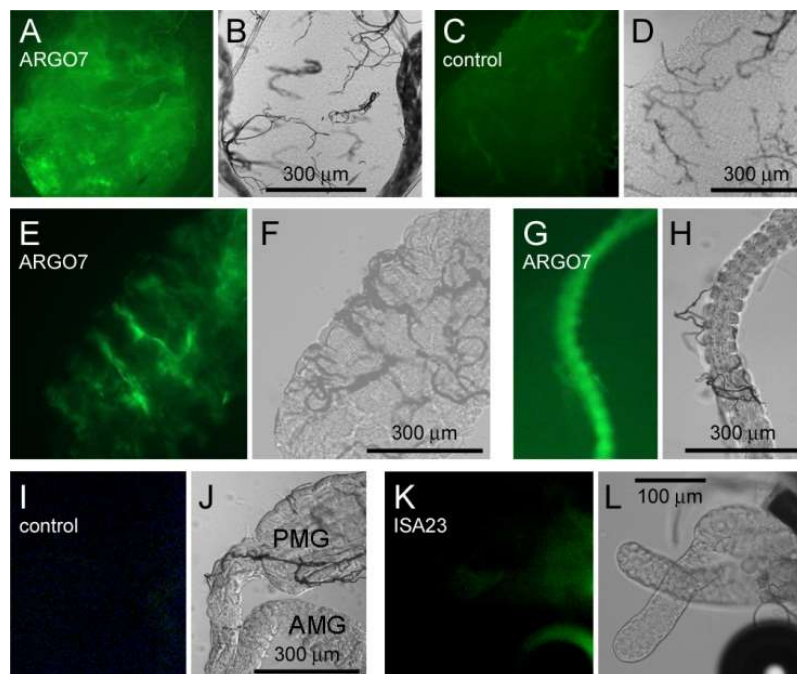

**Figure S13.** Direct delivery of PAAs to *Anopheles gambiae*. Fluorescein-labeled PAAs were diluted in the sugar meal provided to the mosquitoes during three or five days before proceeding to dissection and observation by fluorescence microscopy. (A) Posterior midgut from mosquito fed with ARG07-FITC for three days. (C) Posterior midgut from control mosquitoes fed only with sugar. (E,G) Midguts (E, posterior midgut; G, anterior midgut) dissected from mosquitoes fed with ARG07-FITC for five days. (I) Midgut from control mosquitoes fed only with sugar. Anterior midgut (AMG) and posterior midgut (PMG) are indicated. (K) Salivary glands dissected from mosquitoes fed with ISA23-FITC. Panels B, D, F, H, J and L are brightfield images of each fluorescence image immediate to the left.

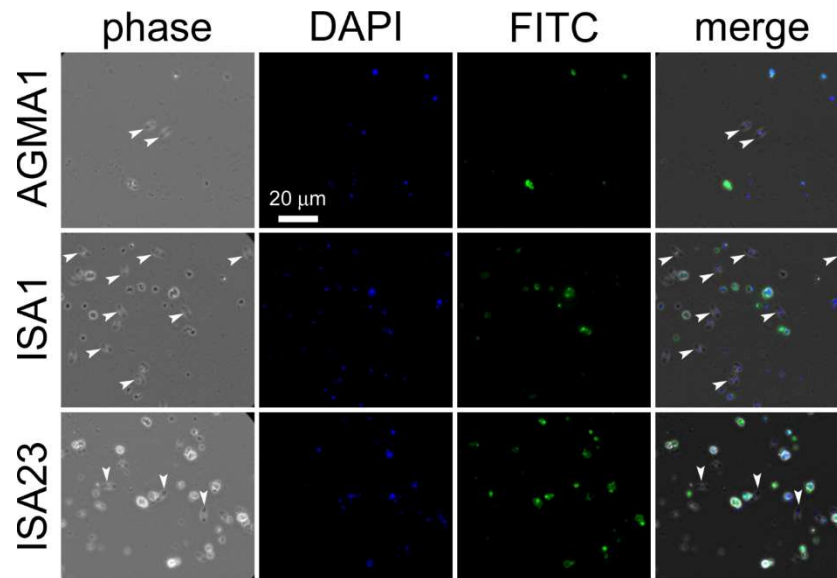

**Figure S14.** Targeting assay of PAA-FITC to *P. falciparum* gametocytes. Some gametocytes are indicated with arrowheads.

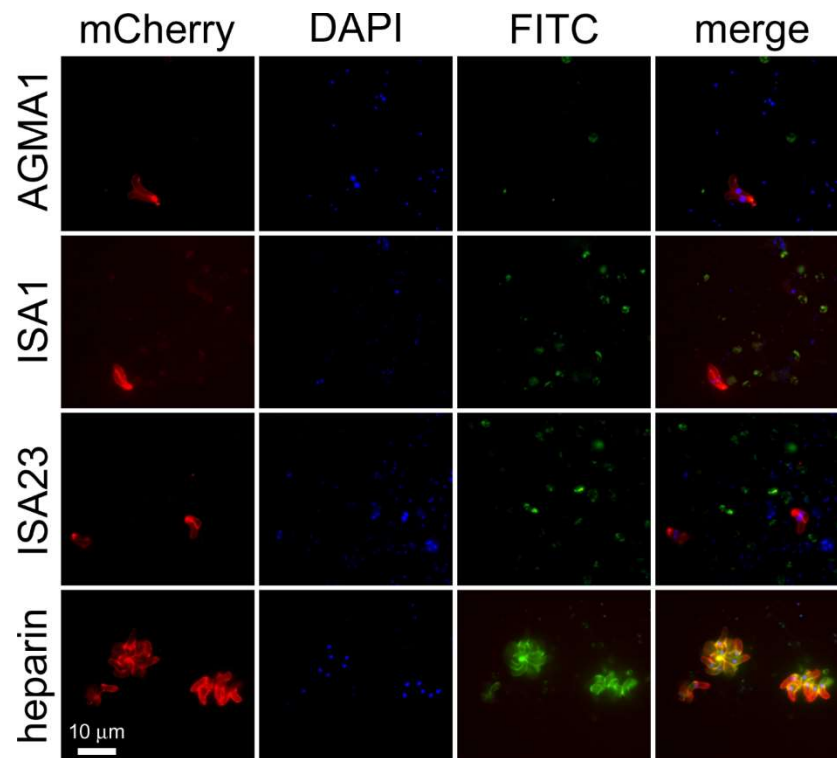

**Figure S15.** Targeting assay of PAA-FITC to *P. berghei* ookinetes expressing the mCherry marker. Heparin-FITC targeting is shown as a positive control [5].

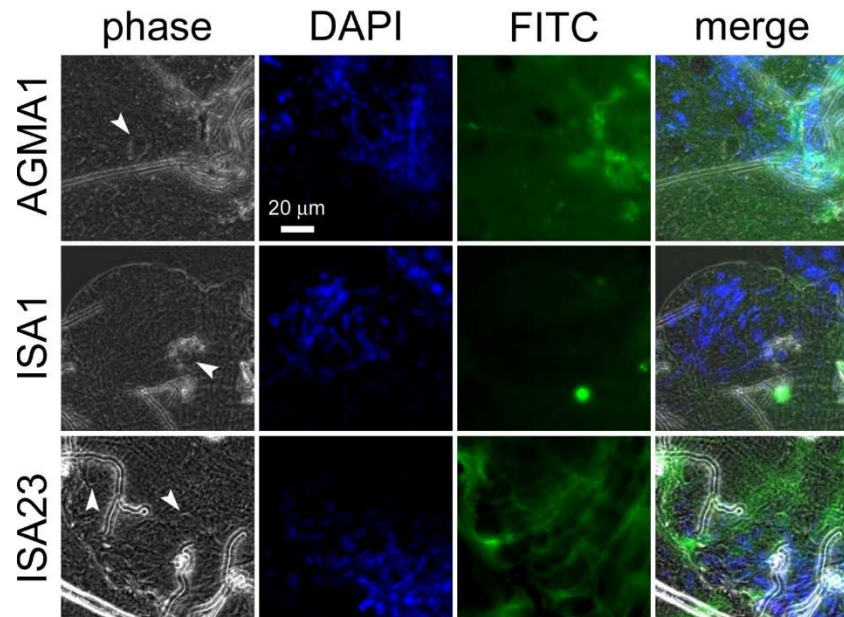

**Figure S16.** Targeting assay of PAA-FITC to *P. berghei* oocysts (indicated with arrowheads).

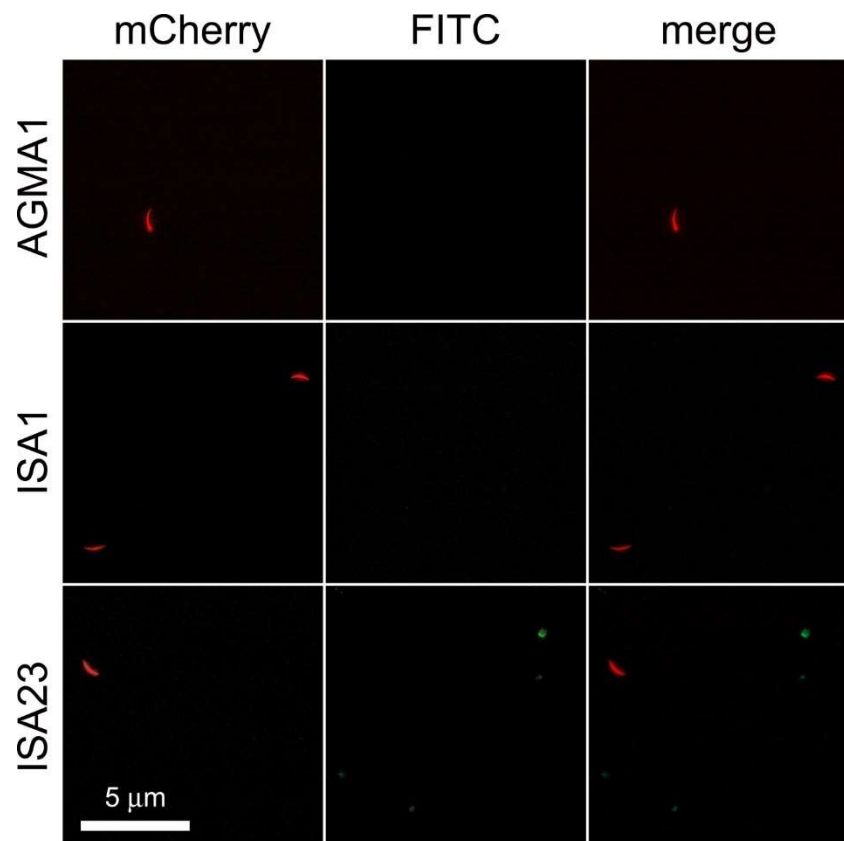

**Figure S17.** Targeting assay of PAA-FITC to *P. berghei* sporozoites expressing the mCherry marker.

**Table S1.** Proteins from the *P. falciparum* 3D7 strain identified in affinity chromatography columns and binding more than one PAA. Proteins potentially involved in extracellular interactions are highlighted in yellow and those involved in protein folding are shadowed in grey.

| UniProtKB                                             | Subcellular location            | Molecular function                                                     | Biological process                                                                                                                                          |
|-------------------------------------------------------|---------------------------------|------------------------------------------------------------------------|-------------------------------------------------------------------------------------------------------------------------------------------------------------|
| <b>37 common proteins to all 4 PAAs</b>               |                                 |                                                                        |                                                                                                                                                             |
| 14-3-3 protein<br>[C0H4V6_PLAF7]                      | cytoplasm / nucleus             | histone binding                                                        | -                                                                                                                                                           |
| Adenosine deaminase<br>[Q8IJA9_PLAF7]                 | cytosol                         | adenosine deaminase activity                                           | adenosine catabolic process, hypoxanthine salvage, inosine biosynthetic process, purine ribonucleoside monophosphate biosynthetic process, response to drug |
| Adenosylhomocysteinase<br>[SAHH_PLAF7]                | cytosol                         | adenosylhomocysteinase activity / NAD binding                          | one-carbon metabolic process, S-adenosylhomocysteine catalytic process, S-adenosylmethionine cycle                                                          |
| Conserved <i>Plasmodium</i> protein [O96127_PLAF7]    | -                               | -                                                                      | -                                                                                                                                                           |
| DNA/RNA-binding protein Alba 4<br>[Q8IDM3_PLAF7]      | cytoplasm / nucleus             | DNA binding / RNA binding                                              | -                                                                                                                                                           |
| Elongation factor 1-alpha<br>[Q8I0P6_PLAF7]           | intracellular (plasma membrane) | GTPase activity / GTP binding / translation elongation factor activity | translational elongation                                                                                                                                    |
| Elongation factor 1-gamma, putative<br>[Q8IDV0_PLAF7] | cytoplasm / nucleus             | glutathione transferase activity / translation elongation factor       | glutathione metabolic process, translational elongation                                                                                                     |
| Elongation factor 2<br>[Q8IKW5_PLAF7]                 | -                               | GTPase activity / GTP binding / translation elongation factor activity | -                                                                                                                                                           |
| Enolase<br>[ENO_PLAF7]                                | cytoplasm                       | magnesium ion binding / phosphopyruvate hydratase activity             | activation of immune response / autophagosome assembly / glycolytic process / transcription                                                                 |

|                                                            |                     |                                                                                                                                                |                                                                                                                                           |
|------------------------------------------------------------|---------------------|------------------------------------------------------------------------------------------------------------------------------------------------|-------------------------------------------------------------------------------------------------------------------------------------------|
| Eukaryotic initiation factor 4A<br>[Q8IKF0_PLAF7]          | cytoplasm / nucleus | 3-5 DNA/RNA helicase activity,<br>ATPase activity, ATP binding                                                                                 | regulation of gene expression, regulation of<br>translational initiation, RNA secondary<br>structure unwinding, translational initiation. |
| Fructose-bisphosphate aldolase [ALF_PLAF7]                 | cytoplasm           | actin binding, fructose-bisphosphate<br>aldolase activity                                                                                      | actin polymerization or depolymerization /<br>glycolytic process                                                                          |
| Glyceraldehyde-3-phosphate dehydrogenase<br>[Q8IKK7_PLAF7] | cytosol / membrane  | glyceraldehyde-3-phosphate<br>dehydrogenase / NAD and NADP<br>binding                                                                          | gluconeogenesis / glycolytic process                                                                                                      |
| Glycophorin-binding protein<br>[GBP_PLAF7]                 | host cell cytoplasm | -                                                                                                                                              | involved in erythrocyte invasion                                                                                                          |
| Heat shock protein 110<br>[Q8IC01_PLAF7]                   | cytoplasm           | ATP binding                                                                                                                                    | -                                                                                                                                         |
| Heat shock protein 70<br>[Q8IB24_PLAF7]                    | cytoplasm / nucleus | ATP binding / heat shock protein<br>binding                                                                                                    | -                                                                                                                                         |
| Heat shock protein 70<br>[K7NTP5_PLAF7]                    | -                   | ATP binding                                                                                                                                    | -                                                                                                                                         |
| Heat shock protein 90<br>[Q8IC05_PLAF7]                    | -                   | ATPase activity / ATP binding /<br>unfolded protein binding                                                                                    | protein folding / response to stress                                                                                                      |
| Hypoxanthine phosphoribosyltransferase<br>[Q8IJS1_PLAF7]   | cytoplasm           | guanine phosphoribosyltransferase<br>activity / hypoxanthine<br>phosphoribosyltransferase activity /<br>metal ion binding / nucleotide binding | IMP salvage / purine ribonucleoside salvage                                                                                               |
| Inositol-3-phosphate synthase [Q8I3Y8_PLAF7]               | cytoplasm           | inositol-3-phosphate synthase activity                                                                                                         | inositol biosynthetic process / phospholipid<br>biosynthetic process                                                                      |

|                                                           |                                                                                                                   |                                                                                                                                                     |                                                                                                                                                                     |
|-----------------------------------------------------------|-------------------------------------------------------------------------------------------------------------------|-----------------------------------------------------------------------------------------------------------------------------------------------------|---------------------------------------------------------------------------------------------------------------------------------------------------------------------|
| Karyopherin beta<br>[Q8I3M5_PLAF7]                        | cytoplasm / nuclear membrane /<br>nuclear periphery / nuclear pore /<br>nuclear pore central transport<br>channel | nuclear localization sequence binding /<br>protein domain specific binding /<br>protein heterodimerization activity /<br>protein transport activity | NLS-bearing protein import into nucleus /<br>nucleocytoplasmic transport / protein import<br>into nucleus, translocation / ribosomal protein<br>import into nucleus |
| L-lactate dehydrogenase [Q76NM3_PLAF7]                    | -                                                                                                                 | L-lactate dehydrogenase activity                                                                                                                    | glycolytic process                                                                                                                                                  |
| M17 leucyl aminopeptidase<br>[Q8IL11_PLAF7]               | cytosol                                                                                                           | aminopeptidase activity / identical<br>protein binding / manganese ion<br>binding / metalloexopeptidase activity                                    | -                                                                                                                                                                   |
| M1-family alanyl aminopeptidase<br>[Q8IEK1_PLAF7]         | cytoplasm / food vacuole / integral<br>component of membrane /<br>microneme / nucleus                             | aminopeptidase activity /<br>metalloaminopeptidase activity /<br>peptide binding / zinc ion binding                                                 | peptide catabolic process / proteolysis                                                                                                                             |
| Ornithine aminotransferase<br>[OAT_PLAF7]                 | cytoplasm                                                                                                         | identical protein binding / ornithine-<br>oxo-acid transaminase activity /<br>pyridoxal phosphate binding                                           | L-proline biosynthetic process / ornithine<br>metabolic process                                                                                                     |
| Phosphoethanolamine N-methyltransferase<br>[Q8IDQ9_PLAF7] | Golgi apparatus                                                                                                   | phosphoethanolamine N-<br>methyltransferase activity                                                                                                | phosphatidylcholine biosynthetic process                                                                                                                            |
| Phosphoglycerate kinase<br>[PGK_PLAF7]                    | -                                                                                                                 | ATP binding / phosphoglycerate<br>kinase activity                                                                                                   | glycolytic process                                                                                                                                                  |
| Phosphoglycerate mutase [Q8IIG6_PLAF7]                    | cytosol                                                                                                           | 2,3-bisphosphoglycerate-dependent<br>phosphoglycerate mutase activity /<br>phosphoglycerate mutase activity                                         | gluconeogenesis / glycolytic process /<br>regulation of pentose-phosphate shunt                                                                                     |
| Phosphotransferase<br>[C6KT76_PLAF7]                      | cytosol                                                                                                           | ATP binding / fructokinase activity /<br>glucokinase activity / glucose binding /<br>hexokinase activity / mannokinase<br>activity                  | cellular glucose homeostasis / glycolytic<br>process                                                                                                                |

|                                                                |                                                                                         |                                                                                                                                   |                                                                                                                                      |
|----------------------------------------------------------------|-----------------------------------------------------------------------------------------|-----------------------------------------------------------------------------------------------------------------------------------|--------------------------------------------------------------------------------------------------------------------------------------|
| Probable ATP-dependent 6-phosphofructokinase<br>[Q8I2Z8_PLAF7] | cytoplasm                                                                               | 6-phosphofructokinase activity / ATP binding / diphosphate-fructose-6-phosphate 1-phosphotransferase activity / metal ion binding | fructose 6-phosphate metabolic process                                                                                               |
| Proteasome subunit alpha type [Q8IBI3_PLAF7]                   | cytoplasm / nucleus                                                                     | endopeptidase activity / threonine-type endopeptidase activity                                                                    | proteasome-mediated ubiquitin-dependent protein catabolic process / ubiquitin-dependent protein catabolic process                    |
| Pyruvate kinase<br>[C6KTA4_PLAF7]                              | cytoplasm                                                                               | kinase activity / magnesium ion binding / potassium ion binding / pyruvate kinase activity                                        | protein homotetramerization                                                                                                          |
| Receptor for activated kinase C<br>[Q8IBA0_PLAF7]              | cytosol                                                                                 | kinase activity / protein kinase C binding                                                                                        | -                                                                                                                                    |
| S-adenosylmethionine synthase<br>[Q7K6A4_PLAF7]                | cytosol                                                                                 | ATP binding / metal ion binding / methionine adenosyltransferase activity / protein homodimerization activity                     | one-carbon metabolic process / S-adenosylmethionine biosynthetic process                                                             |
| Serine-repeat antigen protein<br>[SERA_PLAF7]                  | parasitophorous vacuole (extracellular space / lysosomes / symbiont-containing vacuole) | cysteine-type endopeptidase activity / cysteine-type peptidase activity                                                           | immunoglobulin production / proteolysis / proteolysis involved in cellular protein catabolic process / regulation of immune response |
| STI1-like protein<br>[STI1L_PLAF7]                             | cytosol                                                                                 | -                                                                                                                                 | -                                                                                                                                    |
| T-complex protein 1 subunit alpha<br>[Q8II43_PLAF7]            | cytoplasm                                                                               | ATP binding / protein binding involved in protein folding / unfolded protein binding                                              | de novo protein folding / chaperone-mediated protein folding / protein folding                                                       |



|                                                                         |                                                                                                             |                                                                                                                                                                    |                                                                                                                                                                                 |
|-------------------------------------------------------------------------|-------------------------------------------------------------------------------------------------------------|--------------------------------------------------------------------------------------------------------------------------------------------------------------------|---------------------------------------------------------------------------------------------------------------------------------------------------------------------------------|
| Thioredoxin peroxidase 1<br>[Q8IL80_PLAF7]                              | cytosol                                                                                                     | antioxidant activity / protein<br>dimerization activity / thioredoxin<br>peroxidase activity                                                                       | cell redox / DNA protection / response to heat<br>/ response to oxidative stress                                                                                                |
| <b>30 common proteins to AGMA1, ISA1 and ARGO7</b>                      |                                                                                                             |                                                                                                                                                                    |                                                                                                                                                                                 |
| Actin-1<br>[ACT1_PLAF7]                                                 | cytoskeleton                                                                                                | ATP binding / structural constituent of<br>cytoskeleton                                                                                                            | actin polymerization-dependent cell motility<br>involved in migration of symbiont in host /<br>cytoskeleton organization                                                        |
| ATP-dependent RNA helicase [Q9TY94_PLAF7]                               | cytoplasm / nucleolus / nucleus /<br>spliceosomal complex                                                   | ATP binding / ATP-dependent RNA<br>helicase activity / RNA binding                                                                                                 | cellular response to DNA damage stimulus /<br>mRNA export from nucleus / mRNA splicing,<br>via spliceosomes / regulation gene expression<br>/ RNA secondary structure unwinding |
| Cell division cycle protein 48 homologue,<br>putative<br>[C6KT34_PLAF7] | -                                                                                                           | ATP binding / hydrolase activity                                                                                                                                   | cell division                                                                                                                                                                   |
| <b>EMP1-trafficking protein</b><br>[Q8IBF2_PLAF7]                       | transmembrane (integral component<br>of membrane)                                                           | -                                                                                                                                                                  | -                                                                                                                                                                               |
| <b>Erythrocyte membrane protein 3</b><br>[O96124_PLAF7]                 | transmembrane (cytoplasm integral<br>component of membrane/ Maurer's<br>cleft/ symbiont-containing vacuole) | -                                                                                                                                                                  | -                                                                                                                                                                               |
| Falcilysin<br>[Q76NL8_PLAF7]                                            | apicoplast / food vacuole                                                                                   | metal ion binding /<br>metalloendopeptidase activity                                                                                                               | hemoglobin catabolic process                                                                                                                                                    |
| Glutathione reductase<br>[GSHR_PLAF7]                                   | cytoplasm (apicoplast/ cytoplasm)                                                                           | electron transfer activity / flavin<br>adenine dinucleotide binding /<br>glutathione-disulfide reductase activity<br>/ thioredoxin-disulfide reductase<br>activity | cell redox homeostasis / response to oxidative<br>stress / response to oxygen radical                                                                                           |

|                                                                        |                                                      |                                                                                                  |                                                                                                                                                            |
|------------------------------------------------------------------------|------------------------------------------------------|--------------------------------------------------------------------------------------------------|------------------------------------------------------------------------------------------------------------------------------------------------------------|
| Glycerophosphodiester phosphodiesterase, putative<br>[Q8IM31_PLAF7]    | cytosol / food vacuole / symbiont-containing vacuole | glycerophosphodiester phosphodiesterase activity                                                 | lipid metabolic process                                                                                                                                    |
| GTP-binding nuclear protein [Q7KQK6_PLAF7]                             | nucleus                                              | GTPase activity / GTP binding                                                                    | intracellular protein transport / protein import into nucleus / regulation of cell cycle / ribosomal subunit export from nucleus / RNA export from nucleus |
| Haloacid dehalogenase-like hydrolase<br>[Q8IJ74_PLAF7]                 | cytoplasm                                            | metal ion binding / sugar-phosphatase activity                                                   | dephosphorylation / negative regulation of isopentenyl diphosphate biosynthetic process, methylerythritol 4-phosphate pathway                              |
| Haloacid dehalogenase-like hydrolase, putative<br>[Q8I5F4_PLAF7]       | -                                                    | hydrolase activity                                                                               | -                                                                                                                                                          |
| Heat shock protein 70<br>[Q8I2X4_PLAF7]                                | endoplasmic reticulum                                | ATP binding                                                                                      | -                                                                                                                                                          |
| Mature parasite-infected erythrocyte surface antigen<br>[Q8I492_PLAF7] | host cell plasma membrane                            | -                                                                                                | -                                                                                                                                                          |
| Obg-like ATPase 1<br>[Q8IBM9_PLAF7]                                    | cytoplasm                                            | ATPase activity / ATP binding / GTP binding / ribosomal large subunit binding / ribosome binding | signal transduction                                                                                                                                        |
| Peptidase, putative<br>[Q8IKT5_PLAF7]                                  | cytosol / food vacuole                               | metal ion binding / metalloaminopeptidase activity / protein homodimerization activity           | hemoglobin catabolic process / proteolysis                                                                                                                 |
| Probable inorganic pyrophosphatase<br>[IPYR_PLAF7]                     | cytoplasm                                            | inorganic diphosphatase activity / magnesium ion binding                                         | phosphate-containing compound metabolic process                                                                                                            |

|                                                              |                                                                                                     |                                                                                                               |                                                                                                                                                    |
|--------------------------------------------------------------|-----------------------------------------------------------------------------------------------------|---------------------------------------------------------------------------------------------------------------|----------------------------------------------------------------------------------------------------------------------------------------------------|
| Protein DJ-1<br>[C6KTB1_PLAF7]                               | cytosol                                                                                             | hydroxyethylthiazole kinase activity /<br>peptidase activity                                                  | protein folding / thiamine biosynthetic process                                                                                                    |
| Pyridoxal 5'-phosphate synthase subunit Pdx1<br>[PDX1_PLAF7] | cytoplasm / cytosol                                                                                 | catalytic activity / glutaminase activity<br>/ identical protein binding / pyridoxal<br>5'-phosphate synthase | pyridoxal phosphate biosynthetic process /<br>pyridoxine biosynthetic process / response to<br>singlet oxygen / vitamin B6 biosynthetic<br>process |
| Ring-exported protein 1<br>[Q8I2G1_PLAF7]                    | transmembrane (cytoplasm/ host cell<br>membrane/ integral component of<br>membrane/ Maurer's cleft) | -                                                                                                             | -                                                                                                                                                  |
| S-antigen protein<br>[SANT_PLAF7]                            | parasitophorous vacuole (symbiont-<br>containing vacuole)                                           | -                                                                                                             | -                                                                                                                                                  |
| Serine repeat antigen 3<br>[O96165_PLAF7]                    | extracellular space / lysosome                                                                      | cysteine-type endopeptidase activity /<br>cysteine-type peptidase activity                                    | immunoglobulin production / proteolysis /<br>proteolysis involved in cellular protein<br>catabolic process / regulation of immune<br>response      |
| Serine repeat antigen 4<br>[O96164_PLAF7]                    | extracellular space / lysosome /<br>symbiont-containing vacuole                                     | cysteine-type endopeptidase activity /<br>cysteine-type peptidase activity                                    | immunoglobulin production / proteolysis /<br>proteolysis involved in cellular protein<br>catabolic process / regulation of immune<br>response      |
| Serine repeat antigen 7<br>[O96163_PLAF7]                    | extracellular space / lysosome                                                                      | cysteine-type endopeptidase activity /<br>cysteine-type peptidase activity                                    | immunoglobulin production / proteolysis /<br>proteolysis involved in cellular protein<br>catabolic process / regulation of immune<br>response      |
| Serine repeat antigen 9<br>[Q8I3C0_PLAF7]                    | extracellular space / lysosome                                                                      | cysteine-type endopeptidase activity                                                                          | immunoglobulin production / proteolysis<br>involved in cellular protein catabolic process /<br>regulation of immune response                       |

|                                                           |                                                                                      |                                                                                      |                                                                                |
|-----------------------------------------------------------|--------------------------------------------------------------------------------------|--------------------------------------------------------------------------------------|--------------------------------------------------------------------------------|
| Surface protein P113<br>[Q8ILP3_PLAF7]                    | transmembrane (integral component of membrane/ symbiont-containing vacuole membrane) | -                                                                                    | -                                                                              |
| T-complex protein 1 subunit beta<br>[O97247_PLAF7]        | cytoplasm                                                                            | protein binding involved in protein folding / unfolded protein binding               | -                                                                              |
| T-complex protein 1 subunit delta<br>[C0H5I7_PLAF7]       | cytoplasm                                                                            | ATP binding / protein binding involved in protein folding / unfolded protein binding | de novo protein folding / chaperone-mediated protein folding / protein folding |
| T-complex protein 1 subunit eta [TCPH_PLAF7]              | cytoplasm                                                                            | ATP binding / protein binding involved in protein folding / unfolded protein binding | de novo protein folding / chaperone-mediated protein folding / protein folding |
| T-complex protein 1 subunit gamma<br>[Q8I5C4_PLAF7]       | cytoplasm                                                                            | ATP binding / protein binding involved in protein folding / unfolded protein binding | de novo protein folding / chaperone-mediated protein folding / protein folding |
| Tubulin beta chain<br>[TBB_PLAF7]                         | cytoskeleton (microtubule)                                                           | GTPase activity / GTP binding / structural constituent of cytoskeleton               | microtubule cytoskeleton organization / response to drug                       |
| <b>2 common proteins to AGMA1, ISA23 and ARGO7</b>        |                                                                                      |                                                                                      |                                                                                |
| High molecular weight rhoptry protein 2<br>[C0H571_PLAF7] | rhoptry                                                                              | -                                                                                    | -                                                                              |
| Polyadenylate-binding protein [Q8I5H4_PLAF7]              | cytoplasm                                                                            | mRNA binding / poly (A) binding                                                      | RNA processing                                                                 |
| <b>2 common proteins to AGMA1, ISA1 and ISA23</b>         |                                                                                      |                                                                                      |                                                                                |
| Methionine-tRNA ligase<br>[Q8IJ60_PLAF7]                  | cytoplasm                                                                            | ATP binding / methionine tRNA ligase activity                                        | methionyl-tRNA aminoacylation                                                  |
| T-complex protein 1 subunit epsilon<br>[O97282_PLAF7]     | cytoplasm                                                                            | ATP binding / protein binding involved in protein folding / unfolded protein binding | de novo protein folding / chaperone-mediated protein folding / protein folding |

| 1 common protein to ISA1, ISA23 and ARGO7                        |                                           |                                                                                                            |                                                                                                                                                                                              |
|------------------------------------------------------------------|-------------------------------------------|------------------------------------------------------------------------------------------------------------|----------------------------------------------------------------------------------------------------------------------------------------------------------------------------------------------|
| Triosephosphate isomerase<br>[TPIS_PLAF7]                        | cytosol                                   | triose-phosphate isomerase activity                                                                        | fatty acid biosynthetic process /<br>gluconeogenesis / glyceraldehyde-3-<br>phosphate biosynthetic process / glycerol<br>catabolic process / glycolytic process /<br>pentose-phosphate shunt |
| 6 common proteins to AGMA1 and ISA1                              |                                           |                                                                                                            |                                                                                                                                                                                              |
| Asparagine-tRNA ligase<br>[O96198_PLAF7]                         | cytoplasm                                 | asparagine-tRNA ligase activity / ATP<br>binding / nucleic acid binding                                    | asparaginyl-tRNA aminoacylation                                                                                                                                                              |
| Ethanolamine kinase<br>[Q8IIB7_PLAF7]                            | cytoplasm                                 | ethanolamine kinase activity                                                                               | lipid metabolic process / phosphatidylcholine<br>biosynthetic process /<br>phosphatidylethanolamine biosynthetic<br>process                                                                  |
| Proliferation-associated protein 2g4, putative<br>[Q8ILI2_PLAF7] | -                                         | metalloexopeptidase activity                                                                               | cell cycle arrest / cell proliferation                                                                                                                                                       |
| Serine hydroxymethyltransferase<br>[Q8I566_PLAF7]                | apicoplast / cytoplasm /<br>mitochondrion | glycine hydroxymethyltransferase<br>activity / methyltransferase activity /<br>pyridoxal phosphate binding | D-serine metabolic process / glycine<br>biosynthetic process from serine / one-carbon<br>metabolic process / tetrahydrofolate<br>interconversion                                             |
| T-complex protein 1 subunit theta<br>[O96220_PLAF7]              | cytoplasm                                 | 1-phosphatidylinositol-3-phosphate 5-<br>kinase activity / ATP binding                                     | phosphatidylinositol phosphorylation /<br>protein folding / retrograde transport<br>(endosome to Golgi)                                                                                      |
| Ubiquitin-activating enzyme E1 [Q8I5F9_PLAF7]                    | cytoplasm                                 | ubiquitin activating enzyme activity                                                                       | cellular response to DNA damage stimulus /<br>ubiquitin-dependent protein catabolic process                                                                                                  |

| 4 common proteins to AGMA1 and ISA23                                   |                                                                               |                                                                                                                                                                                      |                                                                                                                              |
|------------------------------------------------------------------------|-------------------------------------------------------------------------------|--------------------------------------------------------------------------------------------------------------------------------------------------------------------------------------|------------------------------------------------------------------------------------------------------------------------------|
| Cytoadherence linked asexual protein 3.2<br>[O77309_PLAF7]             | host cell plasma membrane / rhoptry                                           | cell adhesion molecule binding                                                                                                                                                       | cytoadherence to microvasculature (mediated by symbiont protein)                                                             |
| Eukaryotic translation initiation factor 3 subunit M<br>[Q8IIQ5_PLAF7] | cytoplasm (eukaryotic 43S preinitiation complex)                              | translation initiation factor activity                                                                                                                                               | cytoplasmic translation initiation / formation of translation preinitiation complex / regulation of translational initiation |
| Importin subunit alpha<br>[Q8IAW0_PLAF7]                               | cytosol / nuclear pore / nuclear pore central transport channel / nucleoplasm | nuclear import signal receptor activity / nuclear localization sequence binding / protein domain specific binding / protein heterodimerization activity / protein transport activity | NLS-bearing protein import into nucleus / nucleocytoplasmic transport                                                        |
| Rab GDP dissociation inhibitor [Q8I501_PLAF7]                          | intracellular                                                                 | GTPase activator activity / Rab GDP-dissociation inhibitor activity                                                                                                                  | protein transport / small GTPase mediated signal transduction / vesicle-mediated transport                                   |
| 20 common proteins to AGMA1 and ARGO7                                  |                                                                               |                                                                                                                                                                                      |                                                                                                                              |
| 101 kDa malaria antigen<br>[ABRA_PLAF7]                                | merozoite cell surface / parasitophorous vacuole                              | -                                                                                                                                                                                    | -                                                                                                                            |
| 60S acidic ribosomal protein P0 [Q8II61_PLAF7]                         | cytosolic large ribosomal subunits                                            | structural constituent ribosome                                                                                                                                                      | ribosome biogenesis / translation                                                                                            |
| Acyl-CoA synthetase<br>[Q8I6Z1_PLAF7]                                  | -                                                                             | AMP binding / decanoate-CoA ligase activity / long-chain fatty acid-CoA ligase activity                                                                                              | fatty acid metabolic process                                                                                                 |
| ADP-ribosylation factor 1<br>[ARF1_PLAF7]                              | Golgi apparatus                                                               | GTP binding                                                                                                                                                                          | protein ADP-ribosylation / protein transport / vesicle-mediated transport                                                    |
| Alpha/beta hydrolase, putative [Q8IK20_PLAF7]                          | membrane                                                                      | acylglycerol lipase activity / lipase activity                                                                                                                                       | lipid metabolic process                                                                                                      |

|                                                             |                                                              |                                                                                       |                                                                                                     |
|-------------------------------------------------------------|--------------------------------------------------------------|---------------------------------------------------------------------------------------|-----------------------------------------------------------------------------------------------------|
| Duffy binding-like merozoite surface protein [Q8IJ52_PLAF7] | cell surface / integral component of membrane                | host cell surface binding / receptor activity                                         | entry into host cell / pathogenesis                                                                 |
| Glutamate-tRNA ligase, putative [Q8IDK7_PLAF7]              | cytoplasm                                                    | ATP binding / glutamate-tRNA ligase activity                                          | glutamyl-tRNA aminoacylation                                                                        |
| GTPase-activating protein, putative [Q8I3A9_PLAF7]          | -                                                            | -                                                                                     | -                                                                                                   |
| High molecular weight rhoptry protein 3 [Q8I395_PLAF7]      | rhoptry                                                      | -                                                                                     | entry into host cell                                                                                |
| Merozoite surface protein P41 [PF41_PLAF7]                  | merozoite cell surface / cell membrane                       | miscellaneous                                                                         | miscellaneous                                                                                       |
| Nucleosome assembly protein [Q8I608_PLAF7]                  | cytoplasm / nucleus                                          | histone binding                                                                       | nucleosome assembly                                                                                 |
| Parasitophorous vacuolar protein 1 [Q8II72_PLAF7]           | symbiont-containing vacuole                                  | -                                                                                     | -                                                                                                   |
| PRE-binding protein [Q8IJS7_PLAF7]                          | nucleus                                                      | DNA binding transcription factor activity / double-stranded DNA binding / RNA binding | regulation of transcription (DNA-templated)                                                         |
| Proliferating cell nuclear antigen [PCNA_PLAF7]             | nucleus                                                      | DNA binding / DNA polymerase processivity factor activity                             | leading strand elongation / mismatch repair / regulation of DNA replication / translesion synthesis |
| Proteasome endopeptidase complex [C6KST3_PLAF7]             | nucleus / cytoplasm / proteasome core complex                | endopeptidase activity / threonine-type endopeptidase activity                        | ubiquitin-dependent protein catabolic process                                                       |
| Ribonucleotide reductase small subunit [Q8IM38_PLAF7]       | -                                                            | ribonucleoside-diphosphate reductase activity                                         | deoxyribonucleotide biosynthetic process                                                            |
| Serine repeat antigen 6 [Q9TY96_PLAF7]                      | extracellular space / lysosome / symbiont-containing vacuole | cysteine-type endopeptidase activity / cysteine-type peptidase activity               | immunoglobulin production / proteolysis                                                             |

|                                                    |                                                         |                                                                                            |                                                                                             |
|----------------------------------------------------|---------------------------------------------------------|--------------------------------------------------------------------------------------------|---------------------------------------------------------------------------------------------|
| T-complex protein 1 subunit zeta<br>[C6KST5_PLAF7] | cytoplasm                                               | ATP binding / protein binding<br>involved in protein folding / unfolded<br>protein binding | de novo protein folding / chaperone-mediated<br>protein folding / protein folding           |
| Tubulin alpha chain<br>[Q6ZLZ9_PLAF7]              | cytoskeleton                                            | GTPase activity / GTP binding /<br>structural constituent of cytoskeleton                  | microtubule-based process                                                                   |
| V-type proton ATPase subunit B<br>[Q6ZMA8_PLAF7]   | cell / proton-transporting V-type<br>ATPase (V1 domain) | ATP binding / proton-transporting<br>ATPase activity                                       | ATP hydrolysis coupled proton transport /<br>ATP metabolic process / vacuolar acidification |
| <b>1 common protein to ISA1 and ARGO7</b>          |                                                         |                                                                                            |                                                                                             |
| 1-Cys peroxiredoxin<br>[Q8IAM2_PLAF7]              | cytosol                                                 | antioxidant activity / peroxidase<br>activity / peroxiredoxin activity                     | cell redox homeostasis / response to oxidative<br>stress                                    |
| <b>1 common protein to ISA23 and ARGO7</b>         |                                                         |                                                                                            |                                                                                             |
| Purine nucleoside phosphorylase<br>[Q8I3X4_PLAF7]  | -                                                       | purine-nucleoside phosphorylase<br>activity                                                | nucleoside metabolic process                                                                |



Venn diagram showing the distribution of the 142 *Plasmodium* proteins binding the four PAA columns:

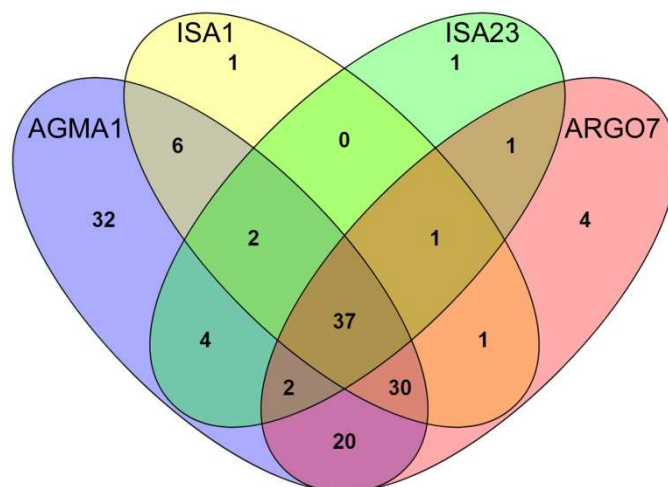

## References

1. Ferruti, P.; Ranucci, E.; Trotta, F.; Gianasi, E.; Evagorou, E.G.; Wasil, M.; Wilson, G.; Duncan, R. Synthesis, characterisation and antitumour activity of platinum(II) complexes of novel functionalised poly(amido amine)s. *Macromol. Chem. Phys.* **1999**, *200* (7), 1644-1654, [https://doi.org/10.1002/\(SICI\)1521-3935\(19990701\)200:7%3C1644::AID-MACP1644%3E3.0.CO;2-P](https://doi.org/10.1002/(SICI)1521-3935(19990701)200:7%3C1644::AID-MACP1644%3E3.0.CO;2-P).
2. Ranucci, E.; Ferruti, P.; Lattanzio, E.; Manfredi, A.; Rossi, M.; Mussini, P.R.; Chiellini, F.; Bartoli, C. Acid-base properties of poly(amidoamine)s. *J. Polym. Sci. A Polym. Chem.* **2009**, *47* (24), 6977-6991, <http://dx.doi.org/10.1002/pola.23737>.
3. Ferruti, P.; Franchini, J.; Bencini, M.; Ranucci, E.; Zara, G.P.; Serpe, L.; Primo, L.; Cavalli, R. Prevalingly cationic agmatine-based amphoteric polyamidoamine as a nontoxic, nonhemolytic, and "stealthlike" DNA complexing agent and transfection promoter. *Biomacromolecules* **2007**, *8* (5), 1498-1504, <http://dx.doi.org/10.1021/bm061126c>.
4. Ferruti, P.; Mauro, N.; Falciola, L.; Pifferi, V.; Bartoli, C.; Gazzarri, M.; Chiellini, F.; Ranucci, E. Amphoteric, prevalingly cationic L-arginine polymers of poly(amidoamino acid) structure: synthesis, acid/base properties and preliminary cytocompatibility and cell-permeating characterizations. *Macromol. Biosci.* **2014**, *14* (3), 390-400, <http://dx.doi.org/10.1002/mabi.201300387>.
5. Marques, J.; Valle-Delgado, J.J.; Urbán, P.; Baró, E.; Prohens, R.; Mayor, A.; Cisteró, P.; Delves, M.; Sinden, R.E.; Grandfils, C.; de Paz, J.L.; García-Salcedo, J.A.; Fernández-Busquets, X. Adaptation of targeted nanocarriers to changing requirements in antimalarial drug delivery. *Nanomedicine: NBM* **2017**, *13*, 515-525, <https://doi.org/10.1016/j.nano.2016.09.010>.

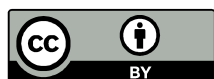

© 2018 by the authors. Submitted for possible open access publication under the terms and conditions of the Creative Commons Attribution (CC BY) license (<http://creativecommons.org/licenses/by/4.0/>).
